1     **ADHERENCE TO NATIONAL HEALTHCARE REFERRAL GUIDELINES AND ITS**  
2     **EFFECT ON THE MANAGEMENT OUTCOMES AMONG CHILDREN SEEN AT A**  
3     **TEACHING HOSPITAL IN WESTERN KENYA.**

4                     Paul Jairus Njanwe<sup>1\*</sup>, Irene Marete<sup>1</sup> & Samuel Ayaya<sup>1</sup>.

5     **Authors Affiliation:**

6             1. Department of Child Health and Paediatrics, School of Medicine – Moi University,  
7             Kenya.

8             \*Corresponding Author:

9     E-mail: [njanwejpwafula@gmail.com](mailto:njanwejpwafula@gmail.com) (PJN)

10

## ABSTRACT

11 **Introduction:** Referral guidelines are meant to ensure coordination and continuity across all  
12 levels of healthcare. Poor adherence to these guidelines could result in increased morbidity and  
13 mortality among the patients who are denied access; especially in the resource constrained  
14 healthcare settings in developing economies.

15 **Aim:** To determine adherence to the national healthcare referral guidelines and immediate  
16 outcomes of children seen at a tertiary teaching hospital in Western Kenya.

17 **Materials and methods:** A Cross-sectional study conducted at the Pediatric emergency  
18 department of Moi Teaching and Referral Hospital in Western Kenya between February to June  
19 2016. A total of 422 children aged below 15 years were recruited systematically.  
20 Sociodemographic and clinical data were collected using interviewer administered  
21 questionnaires and clinical chart reviews respectively. Checklists were used to collect  
22 information from ambulances. Pearson chi-square tests and odds ratios were used to test for  
23 association between predictor and outcome variables using statistical package for social science  
24 (SPSS) version-24.

25 **Results:** More than half (55.5%) of the 422 children enrolled were male while 51.4% were aged  
26 between 5 to 14 years. Hospital referrals accounted for 15.9% (n=67) with the rest being self-  
27 referrals and no counter referrals seen. Adherence to all the four transfer guideline requirements  
28 was observed in 46.3% (n=31) of the 67 hospital referrals. Less than half (46.3%) of the hospital  
29 referrals had their referring facilities calling the receiving facility prior to initiating the referral;  
30 83.6% had a referral document; 64.2% were transferred in ambulances while 68.7% (n=46) were  
31 accompanied by health care workers. Most (88.1%) of the hospital referrals were admitted.  
32 Lower level of parental education (p= 0.025), residing outside the host county (p<0.001) and a  
33 child being older than five years (p = 0.015) were significantly associated with hospital referrals.  
34 Hospital referrals were nearly three times (AOR = 2.932; 95% CI: 2.422 – 3.550; p<0.001) more  
35 likely to be admitted compared to children who were self-referred.

36 **Conclusion:** There is low adherence to national healthcare referral guidelines among children  
37 seen at the second largest national hospital in Kenya; with less than half of hospital referrals  
38 transferred as per the transfer process guidelines.

39

40 **Keywords:** *Hospital Referral, Tertiary Referral Center, Self-Referral, Physician, Paediatrics.*

## 41 Introduction

42 The process of transferring patients from lower-level healthcare systems to those with advanced  
43 infrastructural and human resources is a key element of the health care system globally. In low-  
44 and middle-income countries such as Kenya, this is necessitated by lack of adequate  
45 technological and infrastructural resources as well as professional skills to handle some  
46 debilitating health conditions. Patient referrals especially between various hospitals by healthcare  
47 providers acts as a building elevator to facilitate forward and backward management of clients'  
48 needs. A functional patient referral system ensures optimal use of healthcare facilities and  
49 personnel by improving communication among all healthcare providers involved in the patient's  
50 management [1]. The healthcare system in Kenya is hierarchical from the community health care

51 services, primary health care, county referral services to the national teaching and referral  
52 facilities[2]. The higher the level of the facility, the more sophisticated it is in providing  
53 diagnostic, therapeutic and rehabilitative services (Tom Kizito et al, 2005).

54 To ensure proper coordination of the patient referral system, Kenya's Ministry of Health  
55 developed National Healthcare Referral Guidelines [3]. Both patients and healthcare providers  
56 are expected to adhere to these referral guidelines and ensure safe and proper patient transfer  
57 across healthcare facilities. Optimal adherence to these guidelines further ensures that patients  
58 receive the full spectrum of care provided by the health system, regardless of the level at which  
59 they physically access health care. The referral guidelines recommend that patients should first  
60 seek medical care at primary healthcare facilities except in emergency situations where referral  
61 facilities can be accessed directly. In the event of hospital to hospital referral, the attending  
62 healthcare provider is required to call the receiving facility in advance to ensure availability of  
63 the required medical service, legibly fill-out a client referral form in English, indicate previous  
64 medical care offered including attaching all the relevant diagnostic test results, especially in  
65 emergency referrals. Adherence to transfer process guidelines especially among pediatric  
66 patients requires that the patient is transferred in an ambulance with a functional oxygen supply,  
67 first-aid kit, essential medicines and a transfer couch. The patient in the ambulance must also be  
68 accompanied by a competent healthcare provider.

69 Despite all these guidelines in place, adherence to referral and transfer process guidelines by  
70 both patients and healthcare providers has been a challenge in many national referral hospitals.  
71 This has been exemplified by long queues of patients with medical conditions that could be  
72 easily managed at primary healthcare facilities. Parents of paediatric patients living in urban  
73 centers near these national referral hospitals often opt to bypass the healthcare hierarchy by self-  
74 referring their children.

75 This study therefore aimed to determine the adherence to National Healthcare Referral  
76 Guidelines and document immediate outcomes among children seen at Moi Teaching and  
77 Referral Hospital (MTRH) in Eldoret-Kenya. Specifically, it determined the proportion of  
78 children seen at MTRH who were referred from other health facilities; described the patterns of  
79 referrals; determined the level of adherence to the transfer process guidelines and the immediate  
80 management outcomes of children seen.

## 81 **Materials and methods**

82 This was a cross-sectional study conducted among paediatric patients attending MTRH's sick  
83 child clinic February to June 2016. The hospital is the second largest national government  
84 teaching and referral hospital in Kenya with a bed capacity for 800 patients and attends to  
85 patients in the greater Western Kenya. The study design was adopted because the researcher only  
86 came into contact with the children and their parents at enrollment, while all other information  
87 were obtained from medical records. The eligible children were those below 15 years who were  
88 not revisiting the sick child clinic for review or follow-up due to the same condition during the  
89 study period. Referred children who died on arrival at the sick-child clinic were excluded. The  
90 children were further sampled and enrolled systematically with a sampling interval of 28 until  
91 the desired sample size of 422 was achieved.

92 Patient data was collected using an interviewer administered questionnaire that was divided into  
93 six sections: demographic data, referral status, referral process, status of the transferring vehicle  
94 or ambulance, referral documents, and care given at MTRH. If the patient was self-referred,  
95 information such as the nearest health facility, and distance from MTRH was collected. Primary  
96 data source was the parents or guardians of the sick children; while secondary data obtained from  
97 referral notes, referral forms, patient transfer forms and medical charts. All the patients received  
98 standard pediatric care as is required by the ethical guidelines and approvals obtained from the  
99 Institutional Research and Ethics Committee (IREC) of MTRH and Moi University School of  
100 Medicine (Approval # 1516). Other ethical considerations such as parental consent and  
101 paediatric assents were obtained prior to data collection as well as participants privacy and  
102 confidentiality was ensured by deidentifying patient data and storing their information in  
103 password protected databases. Descriptive (frequency, mean and median with corresponding  
104 proportions, standard deviations and interquartile ranges) and Inferential (Pearson chi-square and  
105 odds ratios at 95% confidence interval) statistical analysis were conducted using Statistical  
106 Package for Social Sciences (SPSS) version 24.

## 107 **Results**

108 This study enrolled 422 children with more than half (51.4%; n=217) of them older than 5 years  
109 of age. The male to female ratio was 1.2:1 and majority (88.9%; n=375) of the children lived in  
110 the hospital's host county of Uasin Gishu in Western Kenya (Table/Fig 1).

111 More than one-tenth (15.9%; n=67) of the children enrolled were hospital referrals to MTRH,  
112 while the rest were self-referrals with no counter-referrals reported. Among the hospital referrals,  
113 majority (86.6%; n=58) were from government facilities, followed by those from private  
114 hospitals (11.9%; n=8), with the least representation from private clinics at 1.5% (n=1). The  
115 main reason for referral was to seek specialized care.

116 The main referral patterns studied were the proportion of hospital referrals living near a public  
117 hospital, the distance they covered to reach MTRH, their chief complaints, tests done prior to  
118 referral (Table/Fig. 2). When a test of association was conducted, it was determined that children  
119 whose parents or guardians had secondary education or less, lived outside Uasin Gishu county  
120 were more than five (5) years of age were more likely to be referred from healthcare facilities  
121 (Table/Fig. 3).

122 When adherence to transfer guidelines was assessed, four aspects (Calling prior to referral,  
123 having a Referral Document, being transferred by an ambulance and the patient being  
124 accompanied by a healthcare worker) were scored. Lack of adherence to any of the steps was  
125 scored as zero while partial adherence was defined as compliance to one of the four transfer  
126 guidelines. Total adherence was when the child's transfer adhered to all the four aspects. When  
127 this technique was adopted, 14.9% (10) of the children referred were transferred without  
128 adhering to any of the four transfer guidelines, while nearly half (46.3%; n=31) of all hospital  
129 referrals had total adherence. More than four-fifths of the children referred from other health  
130 facilities came to MTRH with a referral document, all the ambulances had oxygen supply that  
131 was intact (Table/Fig. 4).

132 Majority of the hospital referrals were admitted while nearly two-thirds of the self-referrals were  
133 treated and discharged (Table/Fig. 5). Paediatric patients who were referred from hospitals were  
134 nearly three times (AOR = 2.932; 95% CI: 2.422, 3.550) more likely to be admitted to the wards  
135 than those who were not (Table/Fig. 6).

## 136 **Discussion**

### 137 *Proportion of Hospital Referrals*

138 Previous studies have demonstrated that low proportions of children are often referred to tertiary  
139 national and teaching hospitals from lower-level medical facilities [4–6]. In this study, 15.9% of  
140 the children seen at MTRH were hospital referrals as required by the national healthcare referral

141 guidelines. This reported proportion of hospital referrals in Kenya among paediatric patients is  
142 less than a third of that reported in Canada at 45.5% [7]. Studies have also compared the  
143 proportion of referrals in the United States of America (USA) and the United Kingdom (UK)  
144 among mixed populations of children and adults (0-64 years) with varying proportions. In the  
145 USA, 30% to 36.8% of patients were referred from medical facilities [8] compared to only  
146 13.9% in the UK [9]. This difference is attributed to the lower proportion of paediatric specialists  
147 in the UK in comparison to the United States of America [8,10].

148 The findings of this study differ from other published studies conducted in East Africa. In a  
149 study conducted at Tanzania's Kilombero District Health Care System [11]; out of 5,030 new  
150 pediatric cases from government and second level health facilities, 28 (0.6%) were referred for  
151 specialized care. This very low proportion of referrals in Tanzania was attributed to the fact that  
152 accurately ill children are not often brought to the health facilities; health facility staff do not  
153 identify children who need referral and healthcare workers only refer children with  
154 socioeconomic support to travel to the referral health facility. Due to similarity in the  
155 socioeconomic status of the parents to paediatric patients from both Kenya and Tanzania, this  
156 could explain the similarity in low proportions of hospital referrals for paediatric patients in  
157 Western Kenya.

#### 158 *Patterns of referrals*

159 This study assessed living near a public hospital, distance to the referral facility, the chief  
160 complaint of the paediatric patient, tests done prior to referral, reasons given for referral and the  
161 final diagnosis as patterns of paediatric patient referral. Nearly two-thirds (62%) of those referred  
162 lived near a public hospital which was four times higher than 15.7% reported in South Africa  
163 [12]. Majority of the children referred from other health facilities had to travel more than 10  
164 kilometers to seek care. Living far away from the national referral hospital increased the  
165 likelihood of the child being referred from a different medical facility compared to those living  
166 near the referral hospital who were self-referred.

167 The most common symptom in nearly half (47.8%) of the paediatric patients referred from other  
168 health facilities presented with a fever, which differs from the 17.2% of those seen in a Hong  
169 Kong referral hospital who were wheezing [13]. This difference could be attributed to  
170 socioeconomic and environmental differences in Kenya and Hong Kong. Whereas Kenya has

171 more cases of infections reported in children and presenting as fever[14], wheezing could be  
172 common in Hong Kong due to a high prevalence of asthma.

173 Most (79.1%) of the children were referred to MTRH for specialized care while in Hong Kong  
174 most of the children were referred due to growth problems. This is because in Kenya, there is an  
175 insufficiency of medical infrastructure and specialists in many public hospitals in the counties  
176 [3]. This necessitates referral to the national hospitals such as MTRH for specialized care. On  
177 arrival at the receiving referral hospital, the children were diagnosed with anemia (15.6%) and  
178 pneumonia (10.4%). This proportion of pneumonia diagnosis reported in this study was lower  
179 than that reported at an advanced paediatric emergency care in Vietnam [4], where 23.7% of the  
180 children were diagnosed with pneumonia.

#### 181 *Adherence to transfer process guidelines*

182 This study reports that nearly half (46.3%; n=31) of the children referred were transferred in total  
183 adherence to all the steps in the transfer guidelines. The steps of interest were: the referring  
184 facility was required to call the receiving facility prior to referral; having a referral document  
185 (either a referral form or a referral note); referral by an ambulance (that has essential medicines,  
186 first aid kit, transfer couch and an oxygen supply that is both intact and functional); and the  
187 patient should be accompanied (by either a clinical officer or a registered nurse). Majority of the  
188 children (83%) either had a referral form or referral note as a referral document. This contrasts  
189 findings from Saudi Arabia [15] where all the children referred from primary care to hospitals  
190 had a referral document. This disparity could be attributed to poor communication channels  
191 between the referring and receiving facilities in Kenya. In Punjab-India [16], pre-referral  
192 documentation was also found to be inadequate and lower than those reported here at 3.7%. The  
193 proportions of children who were transferred by an ambulance (64.2%) and those who were  
194 accompanied (68.7%) was close to those reported in Vietnam [4] at 57.8% and 49.6%  
195 respectively. Higher government ambulance transfer rate of 85.5% from public hospitals was  
196 reported in India [16]. Furthermore, in this study, 87% of the children transferred in an  
197 ambulance were accompanied by a nurse compared to 25.1% in Vietnam [4]. Although no child  
198 in the current study was accompanied by a medical officer, 7.6% of those in Vietnam were [4].  
199 This difference could be attributed to the variance in the proportional distribution of human  
200 resources for health in the two countries.

## 201 *Management outcomes*

202 More than one third (39.1%) of this study's participants who were hospital referrals ended up  
203 being admitted. This finding was consistent with that of Habib et al (2017) which reported  
204 admission outcomes at 39.3%. However, this was four-times higher than that in Vietnam [4]. A  
205 low proportion (0.5%) of the referred children in this study died comparable to that in  
206 Afghanistan at 3% [17]. Furthermore, nearly all (88%) of the children referred from facilities  
207 were admitted in contrast with a study in Saudi Arabia [15] where less than half of the referrals  
208 were treated and discharged. This may be because most of the referred patient at MTRH sick  
209 child clinic were sicker and more required emergency inpatient management.

## 210 **Conclusions and Recommendations**

211 This study determined that less than a quarter of paediatric patients at a national referral hospital  
212 in Western Kenya were hospital referrals with the majority being self-referrals. There was less  
213 than 50% adherence to transfer process guidelines among hospital referrals. Nearly all the  
214 hospital referrals were admitted for further management with approximately three-time  
215 likelihood of admission compared to self-referred children who were mostly treated and  
216 discharged. There is need for reduction in the proportion of self-referrals to national referral  
217 hospitals through targeted improvement on adherence to national healthcare referral guidelines.  
218 Most of the children seeking care at the national referral hospital should be encouraged to visit  
219 primary and secondary level healthcare facilities to reduce on self-referrals. Referring health-  
220 facilities should be encouraged to totally comply with the recommended transfer processes.  
221 Because this study did not determine the perceptions of the parents or guardians and reasons for  
222 self-referring their children; further qualitative studies determining reasons for self-referrals and  
223 lack of adherence to transfer guidelines should be conducted.

## 224 **References**

- 225 1. MOH. Human Resources For Health Norms and Standards Guidelines For The Health  
226 Sector Required investments for equitable, and adequate capacity to deliver the Kenya  
227 Essential Package for Health The Kenya Health Strategic and Investment. Minist Heal  
228 Kenya. 2014; 2014–2018. Available: [http://www.health.go.ke/wp-](http://www.health.go.ke/wp-content/uploads/2015/09/16th%20october%20WHO%20Norms%20and%20Standards%20Book.pdf)  
229 [content/uploads/2015/09/16th october WHO Norms and Standarnds Book.pdf](http://www.health.go.ke/wp-content/uploads/2015/09/16th%20october%20WHO%20Norms%20and%20Standards%20Book.pdf)
- 230 2. MOH. KENYA HEALTH SECTOR REFERRAL STRATEGY. Minist Heal Div Emerg  
231 Disaster Risk Manag Afya House. 2014.



- 232 3. Kamau KJ, Osuga BO, Njuguna S. Challenges Facing Implementation Of Referral System  
233 For Quality Health Care Services In Kiambu County, Kenya. *Heal Syst Policy Res.*  
234 2017;04: 1–8. doi:10.21767/2254-9137.100067
- 235 4. Treleaven E, Pham TN, Le DN, Brooks TN, Le HT, Partridge JC. Referral patterns,  
236 delays, and equity in access to advanced paediatric emergency care in Vietnam. *Int J*  
237 *Equity Health.* 2017;16: 1–11. doi:10.1186/s12939-017-0703-y
- 238 5. English M, Esamai F, Wasunna A, Were F, Ogutu B, Wamae A, et al. Assessment of  
239 inpatient paediatric care in first referral level hospitals in 13 districts in Kenya. *Lancet.*  
240 2004;363: 1948–1953. doi:10.1016/S0140-6736(04)16408-8
- 241 6. Shabila NP, Al-hadithi TS. Assessment of the Iraqi primary care referral system: reporting  
242 a high self-requested referral rate. From Ed. 2012.
- 243 7. Shadd J, Ryan BL, Maddocks H, Thind A. Patterns of referral in a Canadian primary care  
244 electronic health record database: Retrospective cross-sectional analysis. *Inform Prim*  
245 *Care.* 2011;19: 217–223. doi:10.14236/jhi.v19i4.816
- 246 8. Bjørndal A, Carling C, Dyrnes JA, Forrest CB, Majeed A, Weiner JP, et al. Comparison of  
247 specialty referral rates in the United Kingdom and the United States: retrospective cohort  
248 analysis provided technical and administrative support in the United. *Prim Care.*  
249 2002;325: 370–371.
- 250 9. Twamley K, Craig F, Kelly P, Hollowell DR, Mendoza P, Bluebond-Langner M.  
251 Underlying barriers to referral to paediatric palliative care services: Knowledge and  
252 attitudes of health care professionals in a paediatric tertiary care centre in the United  
253 Kingdom. *J Child Heal Care.* 2014;18: 19–30. doi:10.1177/1367493512468363
- 254 10. Forrest LF, Adams J, White M, Rubin G. Factors associated with timeliness of post-  
255 primary care referral, diagnosis and treatment for lung cancer: population-based, data-  
256 linkage study. *Br J Cancer.* 2014;111: 1843–1851.
- 257 11. Font F, Quinto L, Masanja H, Nathan R, Ascaso C, Menendez C, et al. BMC International  
258 Health and Human Rights BMC International Health and Human Rights 2002, 2 x  
259 Paediatric referrals in rural Tanzania: the Kilombero District Study-a case series. *BMC Int*  
260 *Health Hum Rights.* 2002. Available: [http://www.biomedcentral.com/1472-](http://www.biomedcentral.com/1472-698X/2/4)  
261 [698X/2/4](http://www.biomedcentral.com/1472-698X/2/4)<http://www.biomedcentral.com/1472-698X/2/4>
- 262 12. Cluver L, Orkin M. Cumulative risk and AIDS-orphanhood: Interactions of stigma,  
263 bullying and poverty on child mental health in South Africa. *Soc Sci Med.* 2009;69: 1186–  
264 1193. doi:10.1016/j.socscimed.2009.07.033
- 265 13. So LY. Patterns of referral to the paediatric specialist clinic of a regional hospital:  
266 descriptive study. *Hong Kong Med J.* 2000;6: 24–28.
- 267 14. Opondo C, Ntoburi S, Wagai J, Wafula J, Wasunna A, Were F, et al. Are hospitals  
268 prepared to support newborn survival? - an evaluation of eight first-referral level hospitals  
269 in Kenya\*. *Trop Med Int Heal.* 2009;14: 1165–1172. doi:10.1111/j.1365-  
270 3156.2009.02358.x
- 271 15. Jarallah JS. Referral from primary care to hospitals in saudi arabia: 1) quality of referral

- 272 letters and feedback reports. *J Family Community Med.* 1998;5: 15–22. Available:  
 273 <http://www.ncbi.nlm.nih.gov/pubmed/23008585>
- 274 16. Ezhumalai G, Muralidharan J, Bansal A, Nallasamy K, Bharti B. Referrals to a pediatric  
 275 emergency room of a tertiary care teaching hospital before and after introduction of a  
 276 referral education module- a qualitative study&nbsp; 2020; 1–13.  
 277 doi:10.21203/rs.2.20001/v1
- 278 17. Arwal SH, Aulakh BK, Bumba A, Siddula A. Learning by doing in practice: A roundtable  
 279 discussion about stakeholder engagement in implementation research. *Heal Res Policy*  
 280 *Syst.* 2017;15. doi:10.1186/s12961-017-0275-8

## 281 APPENDICES

282 **Table/Fig. 1: Sociodemographic characteristics of Study Participants**

| Variable                                 | Category            | Frequency | Percent |
|------------------------------------------|---------------------|-----------|---------|
| Gender of the child                      | Male                | 234       | 55.5    |
|                                          | Female              | 188       | 44.5    |
| Age of the child                         | <1year              | 51        | 12.1    |
|                                          | 1 – 5years          | 154       | 36.5    |
|                                          | 6 -14years          | 217       | 51.4    |
| Occupation of parent/guardian            | Formally Employed   | 105       | 24.9    |
|                                          | Informally Employed | 199       | 47.2    |
|                                          | Unemployed          | 118       | 27.9    |
| Monthly Family/household Income (in KSh) | <10000              | 126       | 29.9    |
|                                          | 10000 – 20000       | 211       | 50.0    |
|                                          | 21000 – 50000       | 71        | 16.8    |
|                                          | 51000 - 100000      | 12        | 2.8     |
|                                          | >100000             | 2         | 0.5     |
| Residence                                | Uasin Gishu county  | 375       | 88.9    |
|                                          | Other counties      | 47        | 11.1    |
| Parent/Guardian level of Education       | None                | 4         | 0.9     |
|                                          | Primary             | 65        | 15.4    |
|                                          | Secondary           | 274       | 64.9    |
|                                          | Tertiary            | 79        | 18.7    |

283

284

285 **Table/Fig. 2: Summary of Patient Characteristics of Children Referred to MTRH**

| Referral Patterns (N=67)             | Frequency (n) | Percentages (%) |     |
|--------------------------------------|---------------|-----------------|-----|
| <b>Living near a public hospital</b> |               |                 | 287 |
| County Hospital                      | 18            | 31%             |     |
| Health Centers                       | 18            | 31%             | 288 |
| <b>Distance to MTRH</b>              |               |                 |     |
| >10km                                | 59            | 88.1%           | 289 |
| <10km                                | 8             | 11.9%           |     |
| <b>Chief Complaint</b>               |               |                 | 290 |
| Fever                                | 32            | 47.7%           |     |
| Trauma                               | 4             | 6%              | 291 |
| Abdominal Mass                       | 3             | 4.5%            |     |
| Swelling                             | 3             | 4.5%            | 292 |
| Cough                                | 22            | 32.8%           |     |
| Others                               |               | 1.5 %           | 293 |
| <b>Tests done:</b>                   |               |                 |     |
| CBC                                  | 40            | 68.8%           | 294 |
| Other Tests                          | 27            | 31.2%           |     |
| <b>Reason for Referral</b>           |               |                 | 295 |
| Specialized care                     | 53            | 79.1%           |     |
| Lack of Equipment                    | 5             | 7.5%            | 296 |
| Investigations                       | 2             | 3%              |     |
| Further management                   | 7             | 10.4%           | 297 |
| <b>Referral Diagnosis</b>            |               |                 |     |
| Pneumonia                            | 9             | 13.4%           |     |
| Anemia                               | 6             | 8.9%            | 298 |
| Malaria                              | 3             | 4.5             |     |
| Meningitis                           | 3             | 4.5             | 299 |

300

301 **Table/Fig. 3: Association between Sociodemographic Characteristics and Facility Referral**

| Characteristic                               | AOR (95% CI)                   | p-value          |
|----------------------------------------------|--------------------------------|------------------|
| <b>Level of Education (Parent/Guardian):</b> |                                |                  |
| ≤ Secondary                                  | <b>1.146 (1.046 – 1.256)</b>   | <b>0.025</b>     |
| Tertiary                                     | 0.435 (0.198 – 0.960)          |                  |
| <b>County of Residence</b>                   |                                |                  |
| Uasin Gishu                                  | 0.461 (0.353 – 0.601)          | <b>&lt;0.001</b> |
| Other Counties                               | <b>19.604 (10.256 -37.476)</b> |                  |
| <b>Pediatric Age Group</b>                   |                                |                  |
| ≤ 5 years                                    | 0.713 (0.526 – 0.968)          | <b>0.015</b>     |
| > 5 years                                    | <b>1.372 (1.091 – 1.727)</b>   |                  |

302

303 **Table/ Fig. 4: Adherence to Transfer Guidelines among Facility Referrals (N=67)**

| REFERRAL GUIDELINE                 | YES<br>n(%)       | NO<br>n(%)        |
|------------------------------------|-------------------|-------------------|
| <b>Calling prior to Referral</b>   | <b>32 (47.8%)</b> | <b>35 (52.2%)</b> |
| <b>Referral Document</b>           | <b>56 (83.6%)</b> | <b>11 (16.4%)</b> |
| <i>Referral form:</i>              | 31 (55.4%)        |                   |
| <i>Referral note:</i>              | 25 (44.6%)        |                   |
| <b>Transfer by an Ambulance</b>    | <b>43 (64.2%)</b> | <b>24 (35.8%)</b> |
| <i>Oxygen supply:</i>              | 43 (100%)         |                   |
| <i>Oxygen supply intact:</i>       | 43 (100%)         |                   |
| <i>Equipment functional:</i>       | 40 (93%)          | 3 (7%)            |
| <i>Essential Medicines:</i>        | 38 (88.4%)        | 5 (11.6%)         |
| <i>First Aid Kit:</i>              | 40 (93%)          | 3 (7%)            |
| <i>Transfer Couch:</i>             | 42 (97.7%)        | 1 (2.3%)          |
| <b>Patient Accompanied</b>         | <b>46 (68.7%)</b> | <b>21 (31.3%)</b> |
| <i>Clinical officer:</i>           | 6 (13%)           |                   |
| <i>Enrolled Community Nursing:</i> | 11 (23.9%)        |                   |
| <i>Registered Nurse:</i>           | 28 (60.9%)        |                   |
| <i>Nursing student:</i>            | 1 (2.2%)          |                   |

304

305 **Table/Fig. 5: Management outcomes of pediatric patients referred to MTRH (N=422)**

|                                       | Referral Pattern   |                   | Total       |
|---------------------------------------|--------------------|-------------------|-------------|
|                                       | Self-Referral      | Hospital-Referral |             |
| <b>Admitted to The Ward</b>           | 106 (29.9%)        | <b>59 (88.1%)</b> | 165 (39.1%) |
| <b>Death</b>                          | 1 (0.3%)           | 1 (1.5%)          | 2 (0.5%)    |
| <b>Referred to Specialized Clinic</b> | 25 (7%)            | 2 (3%)            | 27 (6.4%)   |
| <b>Discharged Home</b>                | <b>223 (62.8%)</b> | 5 (7.4%)          | 228 (54%)   |
| <b>Total</b>                          | 355 (100%)         | 67 (100%)         | 422 (100%)  |

306 **Table/Fig. 6: Association between Referral Status and Admission**

| OUTCOME          | Adjusted Odds Ratio         |                       | p-value          |
|------------------|-----------------------------|-----------------------|------------------|
|                  | Referred (95% CI)           | Not Referred (95% CI) |                  |
| <b>Admission</b> | <b>2.932 (2.422 -3.550)</b> | 0.210 (0.118 – 0.374) | <b>&lt;0.001</b> |

307
